# Supplementary material for: Extraction and determination of esteric compounds in wound disinfectants
Source: Royal Society of Chemistry journal article supplement (doi:10.1039/d5ra03198b), 2025-01-01
Supplement: d5ra03198b1.pdf [file d5ra03198b1.pdf]

## Supplementary Materials

### Extraction and determination of esteric compounds in wound disinfectants

Mir Ali Farajzadeh<sup>a,b\*</sup>, Zahra Hallaji<sup>a</sup>, Sakha Pezhhanfar<sup>a</sup>, Mohammad Reza Afshar Mogaddam<sup>c,d,e</sup>

<sup>a</sup> *Department of Analytical Chemistry, Faculty of Chemistry, University of Tabriz, Tabriz, Iran*

<sup>b</sup> *Engineering Faculty, Near East University, 99138 Nicosia, North Cyprus, Mersin 10, Turkey*

<sup>c</sup> *Food and Drug Safety Research Center, Pharmaceutical Sciences Institute, Tabriz University of Medical Sciences, Tabriz, Iran*

<sup>d</sup> *Research Center of New Material and Green Chemistry, Khazar University, 41 Mehseti Street, Baku AZ1096, Azerbaijan*

<sup>e</sup> *Pharmaceutical Analysis Research Center, Pharmaceutical Sciences Institute, Tabriz University of Medical Sciences, Tabriz, Iran*

\*Corresponding author: M.A. Farajzadeh

Tel: +98 41 33393084

Fax: +98 41 33340191

E-mail address: mafarajzadeh@yahoo.com; mafarajzadeh@tabrizu.ac.ir

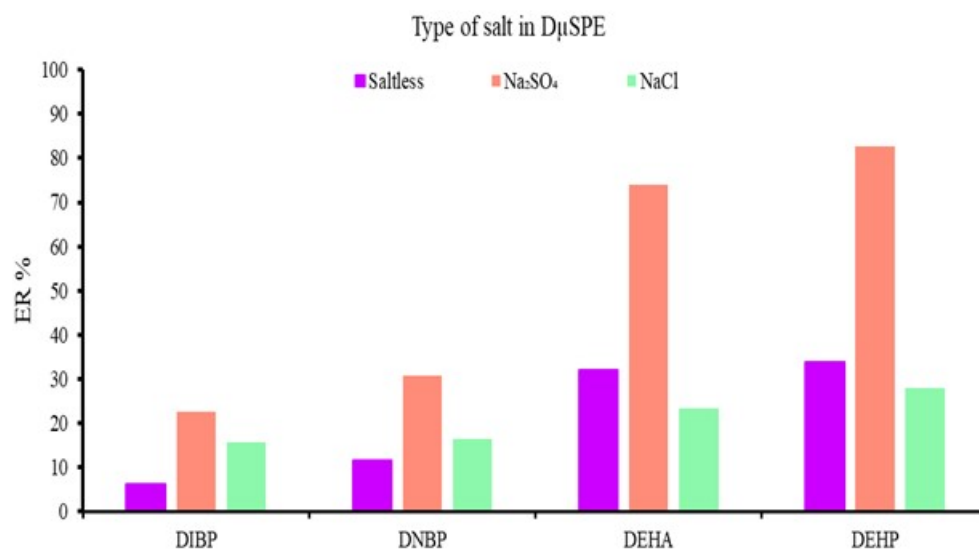

Fig. S1. Influence of ionic strength on ERs of the analytes in DμSPE.

Extraction conditions: are the same as those used in Fig. 3, except 20 mg of MOF was used as the adsorbent.

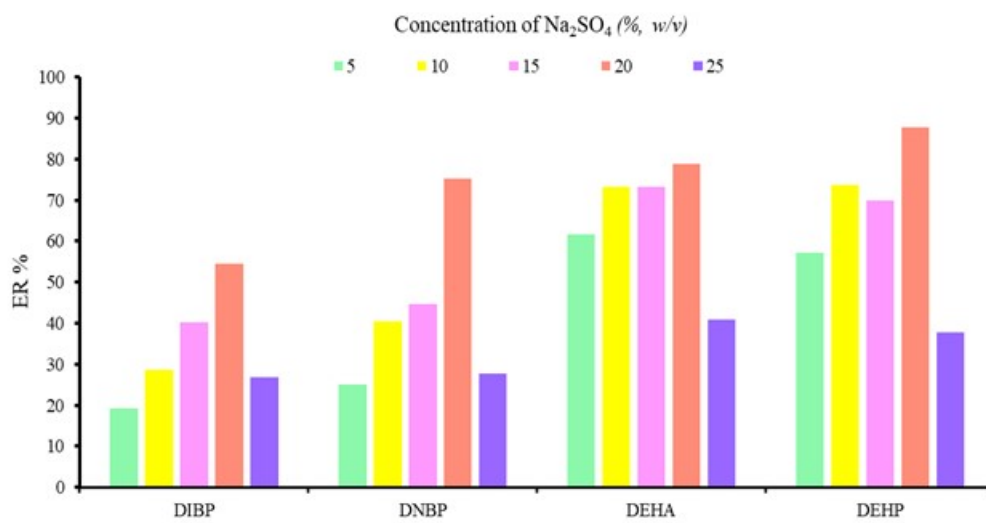

Fig. S2. Effect of  $\text{Na}_2\text{SO}_4$  Concentration.

Extraction conditions: are the same as those used in Fig. S1, except  $\text{Na}_2\text{SO}_4$  was selected.

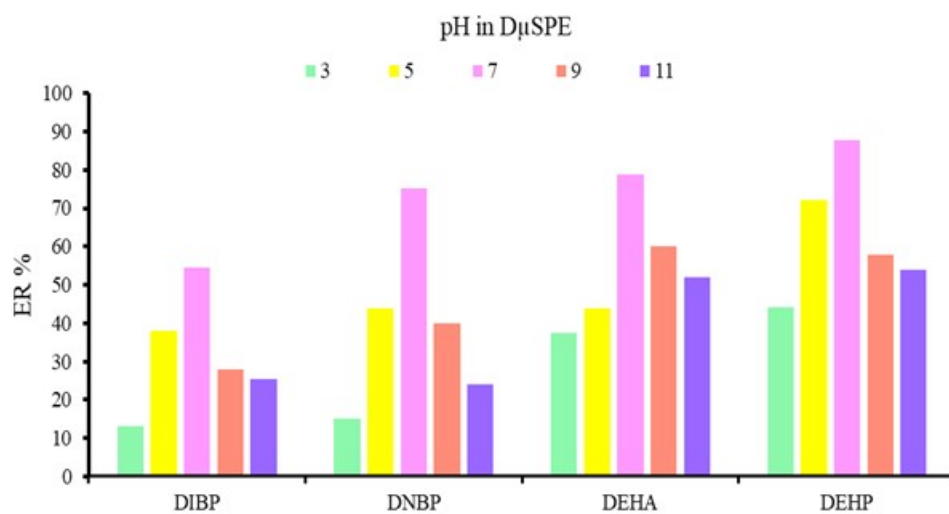

Fig. S3. Optimization of pH in DμSPE step

Extraction conditions: are the same as those used in Fig. S2, except that 20% (w/v)  $\text{Na}_2\text{SO}_4$  solution was selected.

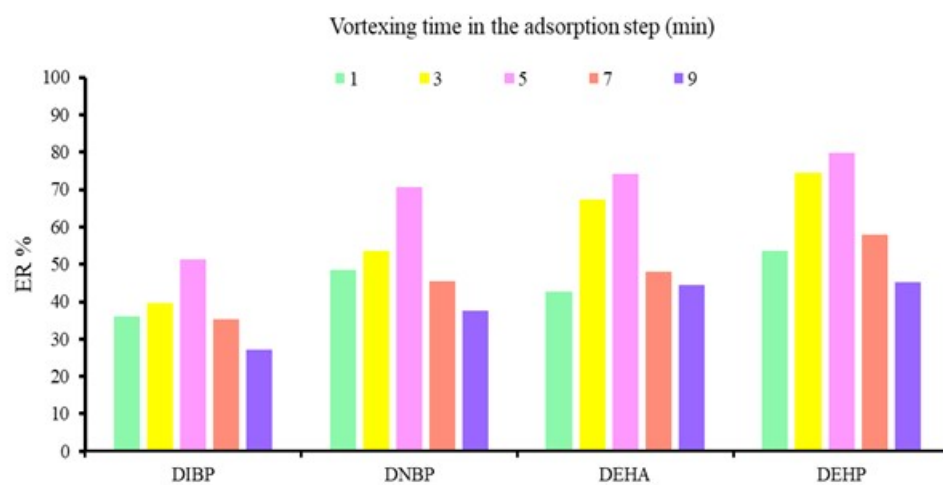

Fig. S4. Optimization of vortexing time in adsorption step.

Extraction conditions: are the same as those used in Fig. S3, except that the experiments were done without pH adjustment.

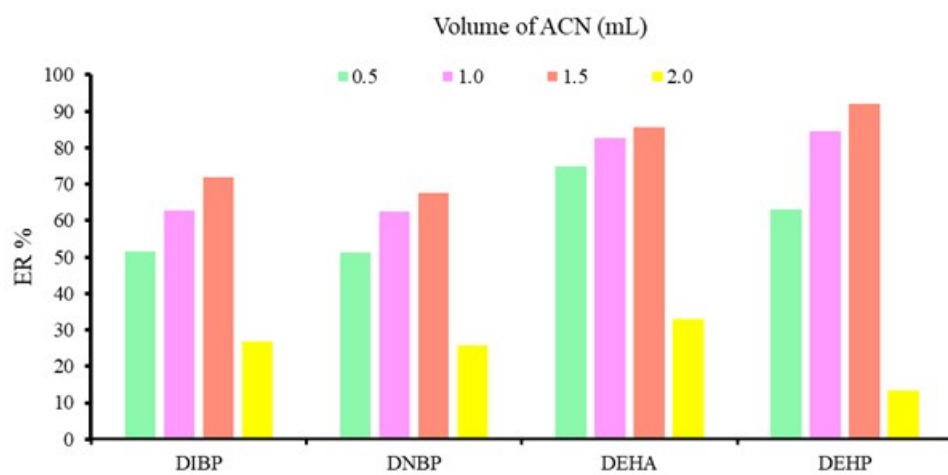

Fig. S5. Optimization of ACN volume.

Extraction conditions: are the same as those used in Fig. 4, except that ACN was selected as the desorption solvent.

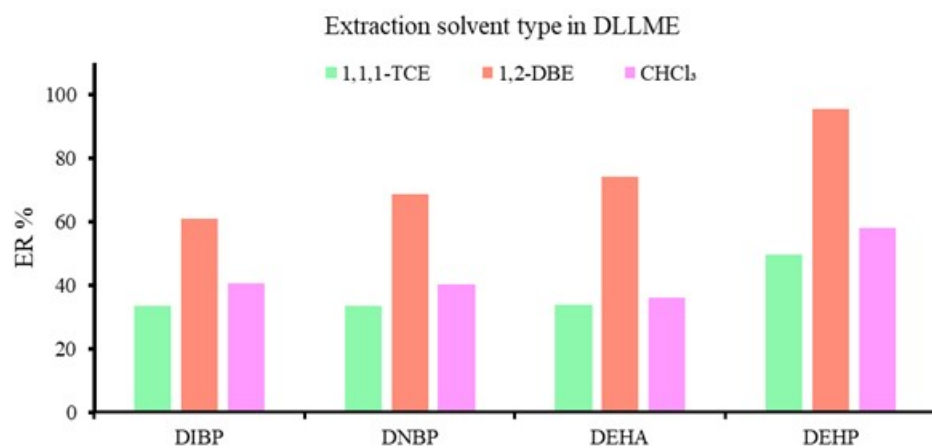

Fig. S6. Selection of extraction solvent type in DLLME step.

Extraction conditions: are the same as those used in Fig. 5, except that 1 min vortexing time was utilized in desorption step.

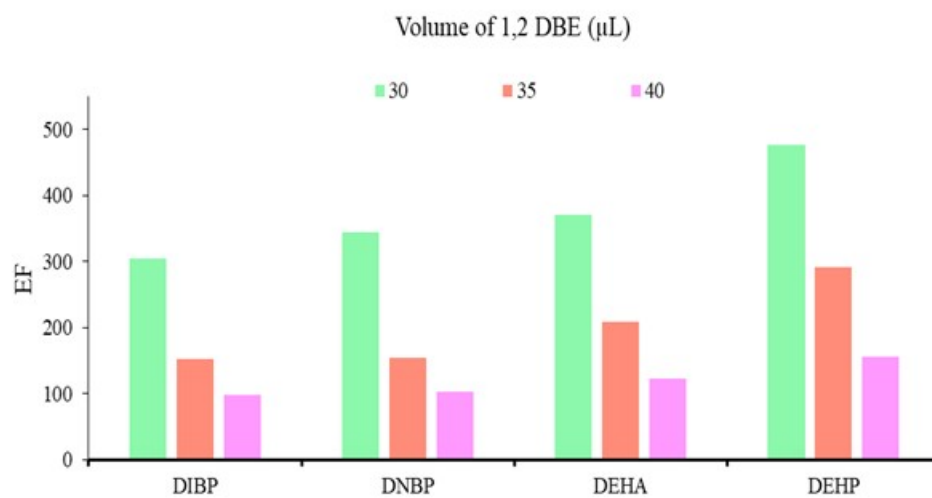

Fig. S7. Optimization of extraction solvent volume.

Extraction conditions: are the same as those used in Fig. S6, except 1,2-DBE was chosen as the extraction solvent.



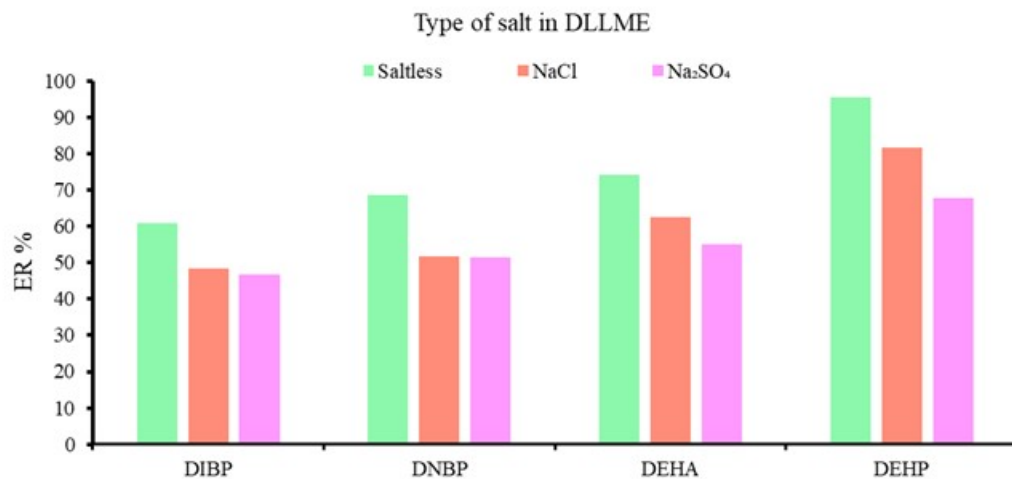

Fig. S8. Influence of ionic strength in DLLME step.

Extraction conditions: are the same as those used in Fig. S7, except that 30  $\mu$ L of 1,2-DBE was used as the extraction solvent

$\text{CHCl}_3$

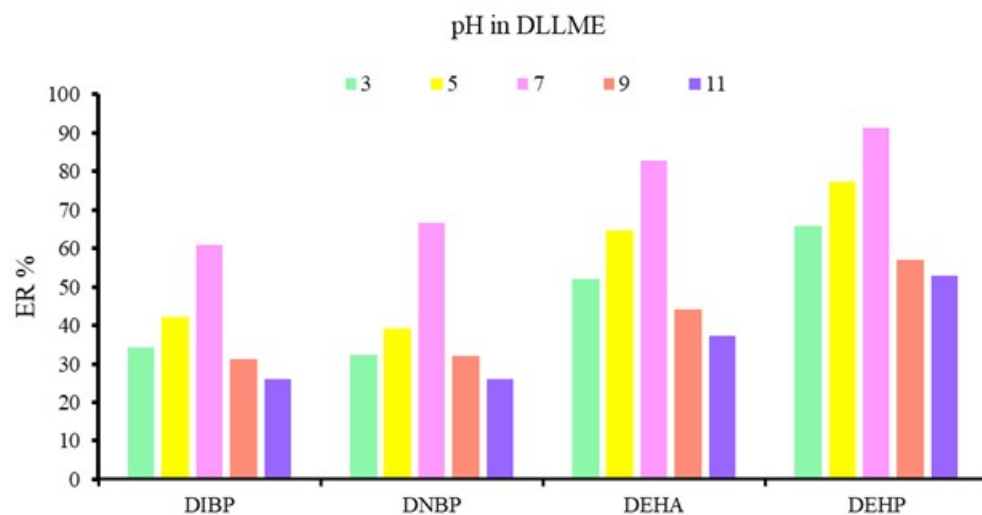

Fig. S9. Optimization of pH of aqueous solution in DLLME step.

Extraction conditions: are the same as those used in Fig. S8, except that saltless solution was selected in DLLME section.
